# Supplementary material for: Methane emission intensity metrics: unmasking the trade-offs
Source: Research Square preprint supplement (doi:10.21203/rs.3.rs-6753363/v1), 2025-05-28
Supplement: Supplementary file 1 [file 978fb86d5cd23e6b245dcd1e.docx]

Supplemental Information

**Methane emission intensity metrics: unmasking the trade-offs**

Scott P. Seymour1,2*, Donglai Xie1, Mary Kang2, Stefan Schwietzke1, Daniel Zavala-Araiza1, Steven P. Hamburg1

*1Environmental Defense Fund, Montreal, QC, Canada*

*2Department of Civil Engineering, McGill University, Montreal, QC H3A 0G4, Canada*

*Corresponding authors: [sseymour@edf.org](mailto:sseymour@edf.org), [scott.seymour@mail.mcgill.ca](mailto:scott.seymour@mail.mcgill.ca)

# Additional Tables & Figures

As described in the main text, we assumed gas compositions for a generic case and for Canadian and U.S. regions in intensity calculations (Table S1). The generic gas composition from the American Petroleum Institute1 was assumed for Sect. 4.1 (80% methane, 15% ethane, 5% propane, by volume). For Canadian regions, average methane content was assumed to be 85.7%, 86.6%, and 79.5% in B.C., Alberta, and Saskatchewan, respectively.; B.C. values were based on federal government estimates for gas production sites2 and Alberta and Saskatchewan were calculated as a production-weighted average of methane volume fractions from the producer-level production data and regional gas composition data3,4. In the U.S., we assumed methane volume fractions consistent with literature values. The balance gas was assumed to be proportional to the API “generic” gas content – three-quarters of non-methane gas was ethane, and one-quarter propane – allowing us to estimate heating values.

Table S. Assumed gas compositions and higher heating values for Canadian provinces, U.S. basins, and a “generic” gas composition from the American Petroleum Institute. Ethane and propane proportions in each region are assumed from the “generic” proportions – three-quarters of non-methane gas is ethane, one-quarter propane.

| **Country** | **Region** | **Gas Composition [%, V/V]** | | | **HHV**  **[MJ/m3]** |
| --- | --- | --- | --- | --- | --- |
| **Methane** | **Ethane** | **Propane** |
| NA | Generic | 80.0 | 15.0 | 5.0 | 44.9 |
| Canada | British Columbia | 86.6 | 10.1 | 3.4 | 42.5 |
| Canada | Saskatchewan | 79.5 | 15.4 | 5.1 | 45.1 |
| Canada | Alberta | 85.7 | 10.7 | 3.6 | 42.8 |
| United States | Anadarko | 93.0 | 5.3 | 1.8 | 40.2 |
| United States | Appalachian (North) | 95.0 | 3.8 | 1.3 | 39.5 |
| United States | Appalachian (South) | 90.0 | 7.5 | 2.5 | 41.3 |
| United States | Bakken | 47.0 | 39.8 | 13.3 | 56.8 |
| United States | Barnett | 89.0 | 8.3 | 2.8 | 41.6 |
| United States | Denver-Julesburg | 79.0 | 15.8 | 5.3 | 45.3 |
| United States | Eagle Ford (North) | 73.0 | 20.3 | 6.8 | 47.4 |
| United States | Eagle Ford (South) | 73.0 | 20.3 | 6.8 | 47.4 |
| United States | Fayetteville | 96.0 | 3.0 | 1.0 | 39.1 |
| United States | Greater Green River (East) | 92.0 | 6.0 | 2.0 | 40.6 |
| United States | Greater Green River (South) | 92.0 | 6.0 | 2.0 | 40.6 |
| United States | Haynesville | 86.0 | 10.5 | 3.5 | 42.7 |
| United States | Permian-Delaware | 80.0 | 15.0 | 5.0 | 44.9 |
| United States | Permian-Midland | 80.0 | 15.0 | 5.0 | 44.9 |
| United States | Piceance | 89.0 | 8.3 | 2.8 | 41.6 |
| United States | Uinta | 89.0 | 8.3 | 2.8 | 41.6 |


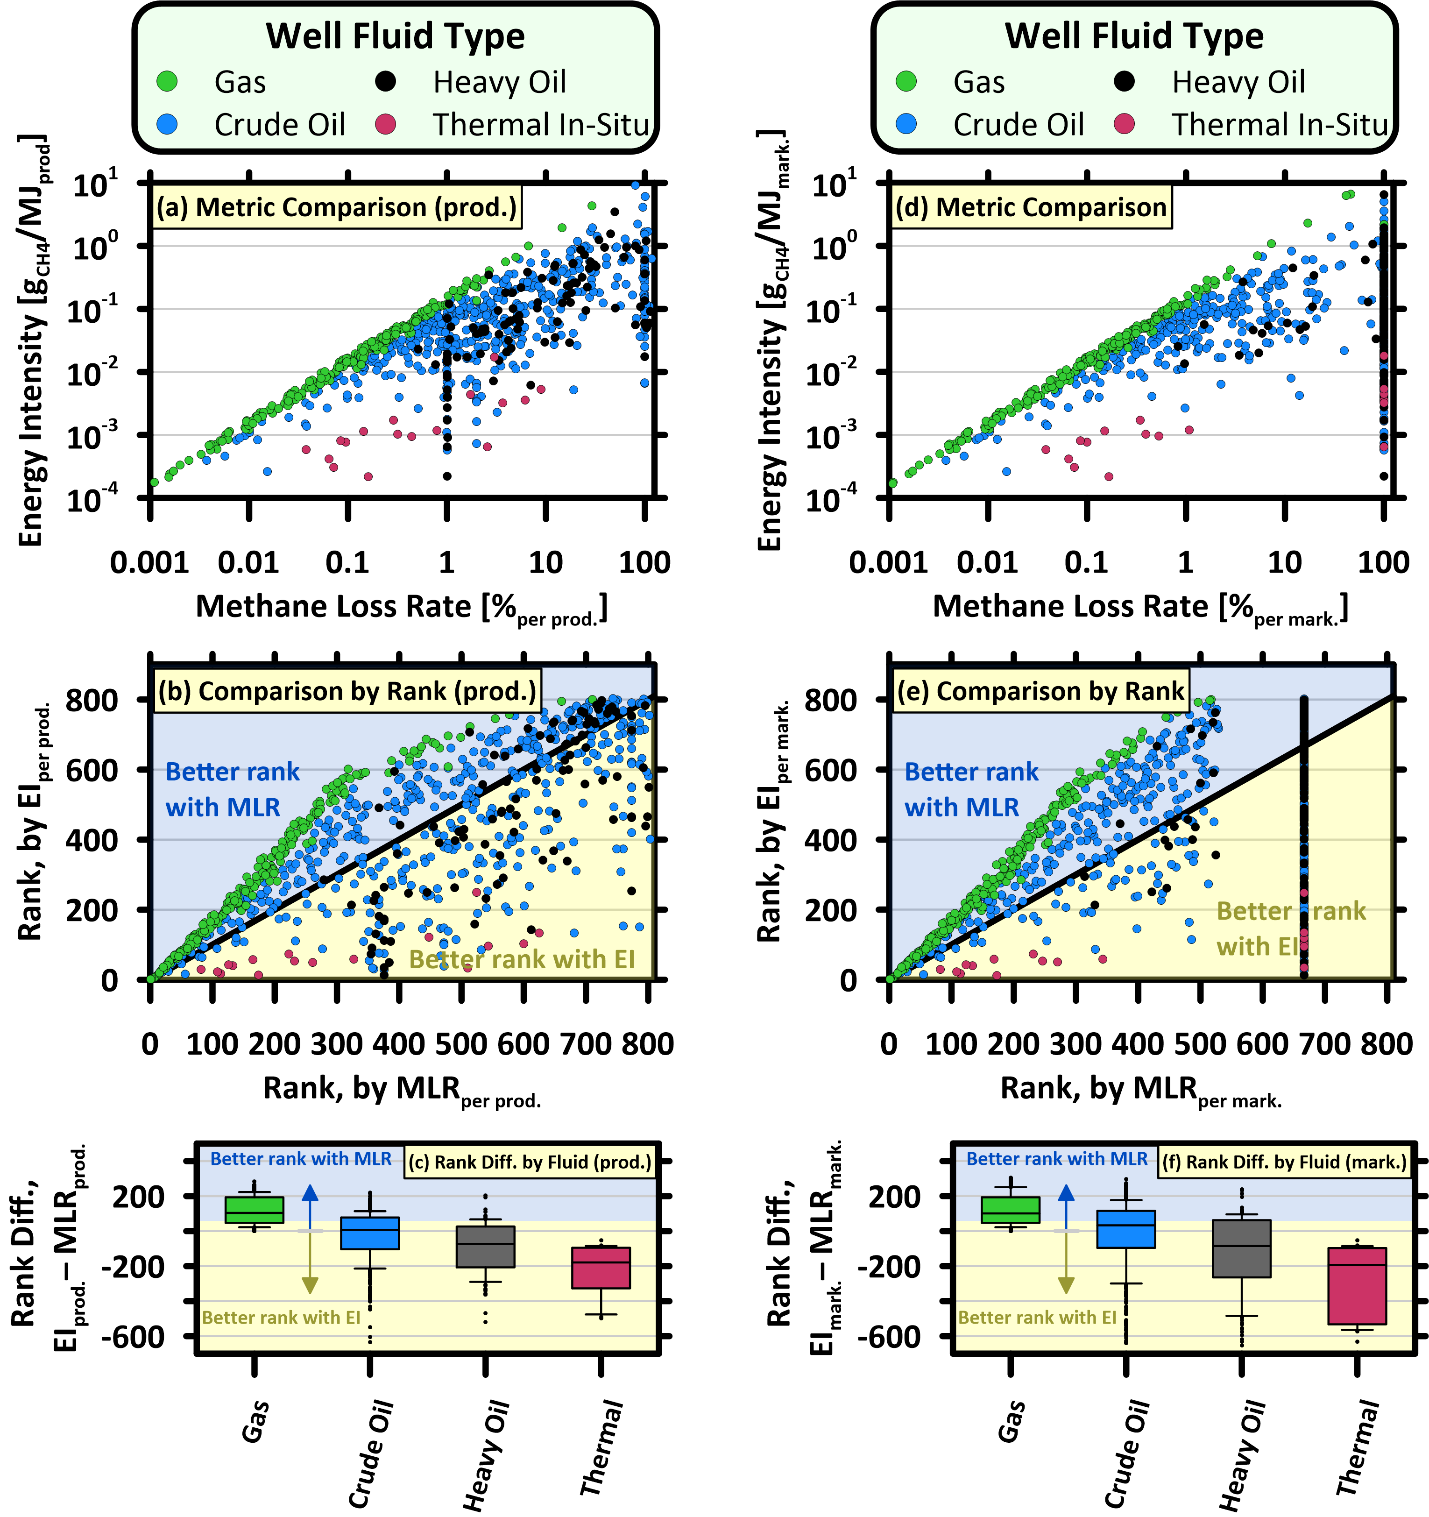


Figure S. Reproduction of Fig. 2 of the main text (a – c) for produced volumes-normalized MLR and EI compared with marketed volumes-normalized metrics (d – f). Any operator with loss rates greater than 100% were given 100% values. Importantly, this shows that methane loss rate per produced amounts ranks operators that have no marketed gas. Indeed, 48% of the 562 oil operators shown here seemingly had no marketed gas at their production sites.


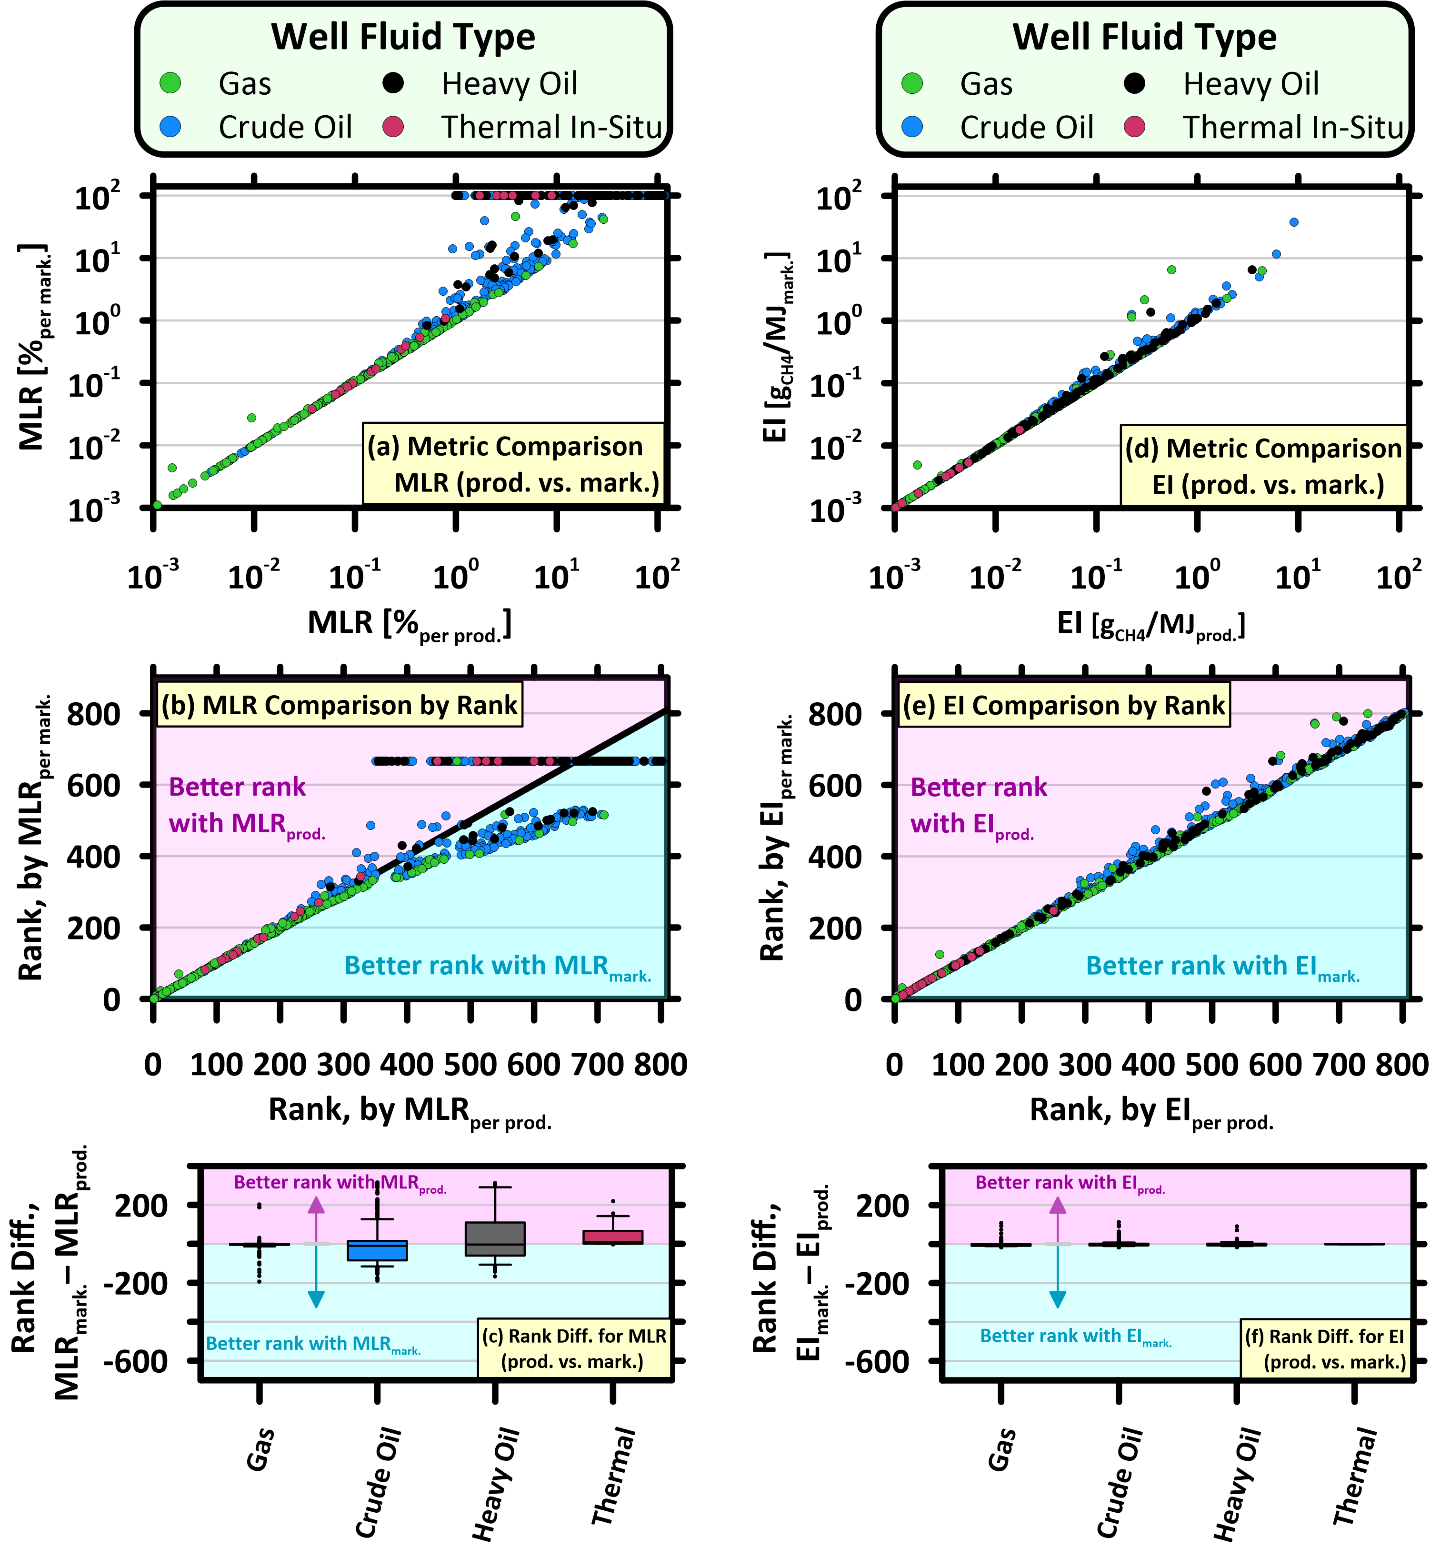


Figure S. Reproduction of Fig. S1 but comparing MLR normalized by produced vs. marketed amounts (a – c), and the energy intensity by produced vs. marketed amounts (d – f). While this shows that the energy intensity ranking of producers does not change meaningfully between produced and marketed amounts (d – f), the same cannot be said for the methane loss rate, where the relative ranking changes much more significantly, the result of some oil sites having no marketed methane.

# References

1. Campbell, L., Toolen, J., Grubert, D. & Napp, G. *Compendium of Greenhouse Gas Emission Methodologies for The Natural Gas and Oil Industry*. (American Petroleum Institute, Raleigh, NC, 2021).

2. ECCC. *Upstream Oil and Gas Fugitive Emissions Model*. (Environment and Climate Change Canada., Ottawa, ON, 2022).

3. ECCC. National Inventory Report 1990-2022: Greenhouse Gas Sources and Sinks in Canada. https://www.canada.ca/en/environment-climate-change/services/climate-change/greenhouse-gas-emissions/inventory.html (2024).

4. Tyner, D. R. & Johnson, M. R. Improving Upstream Oil and Gas Emissions Estimates with Updated Gas Composition Data. (2020).
